# Supplementary material
Source: publisher figshare collection journal article supplement (https://gsajournals.figshare.com/ndownloader/files/25741478)
Supplement: Supplementary file 1 [file 25741478]

## Sheet: SVs
Table S2. List of SVs described in this study with citations for SVs that have been previously described.
SVs from the current study	Publication(s)	Notes
7q11.2 SD7-I to II inversion	Osborne et al. 2001
7q11.2 SD7-II inversion	Kidd et al. 2008	overlapping inversion (296129 bp)
7q11.2 SD7-I: A-CNV	Sudmant et al. 2013	overlapping duplications, size range: 10-27kb
7q11.2 SD7-II: A-CNV	Ju et al. 2010	overlapping deletion (24165 bp)
7q11.2 SD7-II: A-CNV	Conrad et al. 2010	overlapping duplication (19363 bp)
7q11.2 SD7-II: A-CNV	Perry et al. 2008	gain (15244 bp)
15q13.3 G1-1		reference
15q13.3 G1-2	Conrad et al. 2010	loss (36036 bp)
15q13.3 G1-3	Pang et al. 2010	gain (78552 bp)
15q1.33 G1-4	Coe et al. 2014 and Cooper et al. 2011	loss (566372 bp) and loss (536129 bp)
15q13.3 G2-1		reference
15q13.3 G2-2	Antonacci et al. 2014
15q13.3 G2-3	Alsmadi et al. 2014	loss (57701 bp)
15q13.3 G3-1	Antonacci et al. 2014
15q13.3 G3-2		novel, loss in inverted haplotype
15q13.3 G3-3	Antonacci et al. 2014
15q13.3 G3-4		novel
15q13.3 G4-1		reference
15q13.3 G4-2		novel
15q13.3 G4-3	Pang et al. 2010	gain (84230 bp)
15q13.3 G4-4	Perry et al. 2008 and Conrad et al. 2010	loss (31148 bp) and loss (34988 bp)
15q13.3 G4-5	Antonacci et al. 2014
16p12.2 G1-1	Tuzun et al. 2005, Antonacci et al. 2010
16p12.2 G1-2	Antonacci et al. 2010
16p12.2 G1-3		reference
16p12.2 G2-1	Antonacci et al. 2010
16p12.2 G2-2, S3		novel
16p12.2 G2-3	Antonacci et al. 2010
16p12.2 G3-1	Antonacci et al. 2010
16p12.2 G3-2	1000 Genomes Consortium Phase 3	deletion (17136 bp) but not clear whether it’s in reference or S1, S2 configurations
16p12.2 G3-3		reference
